# Supplementary material for: Efficient Gene Knockout in Goats Using CRISPR/Cas9 System
Source: PLOS journal article supplement (doi:10.1371/journal.pone.0106718), 2014-09-04
Supplement: S1 (10.1371/journal.pone.0106718.s001) [file journal.pone.0106718.s001]

Figure S1

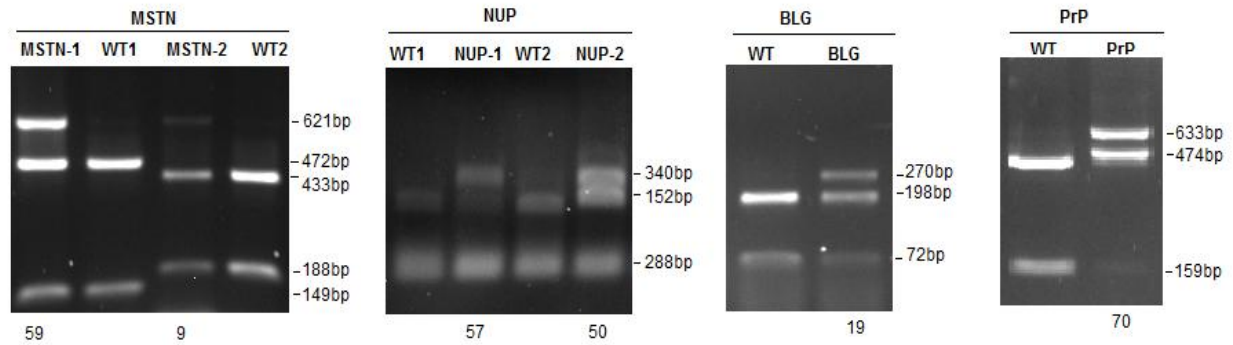

**Figure S1.** RFLP assay for detecting Cas9/gRNA-mediated mutations. PCR products from MSTN, NUP, BLG and PrP Cas9/gRNA-treated cells were digested with Van91I, BSTZ171, HindIII, FatI, NlaIII, Bsu36I, respectively; WT: PCR products from wild-type cells were digested with Van91I, BSTZ171, HindIII, FatI, NlaIII, Bsu36I, respectively.
